# The American Journal of Psychiatry

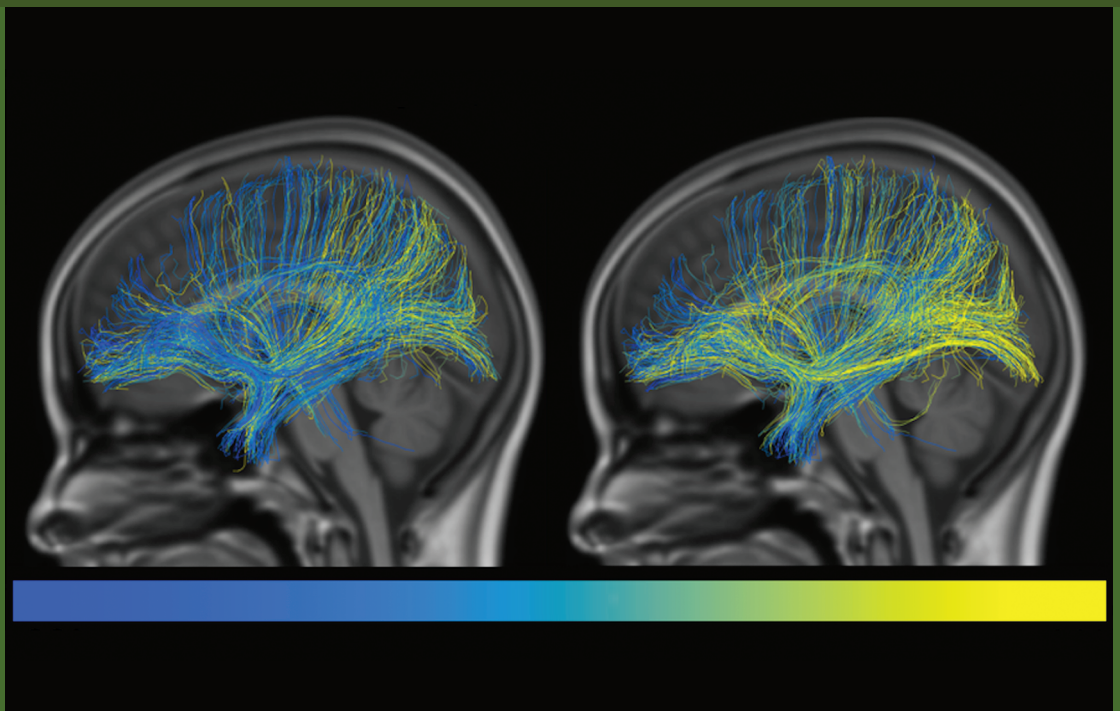

On the Origins of Schizophrenia

Incidence and Impact of Psychotic Experiences From Childhood  
to Adulthood, and Prediction of Psychotic Disorder

Lead-Time Bias Confounds Association Between Duration of  
Untreated Psychosis and Illness Course in Schizophrenia

Dose-Response Meta-Analysis of Antipsychotic Drugs  
for Acute Schizophrenia
